# Purinergic P2X Receptor Regulates *N*-Methyl-D-aspartate Receptor Expression and Synaptic Excitatory Amino Acid Concentration in Morphine-tolerant Rats

Yueh-Hua Tai, Ph.D.,\* Pao-Yun Cheng, Ph.D.,† Ru-Yin Tsai, Ph.D.,‡ Yuh-Fung Chen, Ph.D.,§ Chih-Shung Wong, M.D., Ph.D.||

## ABSTRACT

**Background:** The present study examined the effect of P2X receptor antagonist 2',3'-*O*-(2,4,6-trinitrophenyl) adenosine 5'-triphosphate (TNP-ATP) on morphine tolerance in rats.

**Methods:** Male Wistar rats were implanted with two intrathecal catheters with or without a microdialysis probe, then received a continuous intrathecal infusion of saline (control) or morphine (tolerance induction) for 5 days.

**Results:** Long-term morphine infusion induced antinociceptive tolerance and up-regulated *N*-methyl-D-aspartate receptor subunits NR1 and NR2B expression in both total lysate and synaptosome fraction of the spinal cord dorsal horn. TNP-ATP (50  $\mu$ g) treatment potentiated the antinociceptive effect of morphine, with a 5.5-fold leftward shift of the morphine dose–response curve in morphine-tolerant rats, and this was associated with reversal of the up-regulated NR1 and NR2B subunits in the synaptosome fraction. NR1/NR2B-specific antagonist ifenprodil treatment produced a similar effect as TNP-ATP; it also potentiated the antinociceptive effect of morphine. On day 5, morphine challenge resulted in a significant increase in aspartate and glutamate concentration in the cerebrospinal fluid dialysates of mor-

phine-tolerant rats, and this effect was reversed by TNP-ATP treatment. Moreover, the amount of immunoprecipitated postsynaptic density-95/NR1/NR2B complex was increased in morphine-tolerant rats, and this was prevented by the TNP-ATP treatment.

**Conclusions:** The findings suggest that attenuation of morphine tolerance by TNP-ATP is attributed to down-regulation of *N*-methyl-D-aspartate receptor subunits NR1 and NR2B expression in the synaptosomal membrane and inhibition of excitatory amino acids release in morphine-tolerant rats. The TNP-ATP regulation on the *N*-methyl-D-aspartate receptor expression may be involved in a loss of scaffolding proteins postsynaptic density-95.

## What We Already Know about This Topic

- ❖ P2X receptors, a family of ion channels activated by extracellular adenosine 5'-triphosphate, may participate in neuropathic and inflammatory pain and present targets for analgesia.

## What This Article Tells Us That Is New

- ❖ Treatment of rodents with a P2X receptor antagonist diminished opioid tolerance in part by down-regulating glutamate receptors and inhibiting excitatory amino acid release.

\* Postdoctoral Fellow, Department of Anesthesiology, Tri-service General Hospital and National Defense Medical Center, Taipei, Taiwan. ‡ Postdoctoral Fellow, Department of Medical Research, China Medical University Hospital, Taichung, Taiwan. † Assistant Professor, § Associate Professor, Graduate Institute of Chinese Pharmaceutical Science, China Medical University, Taichung, Taiwan. || Professor, Department of Anesthesiology, Cathay General Hospital, Taipei, Taiwan.

Received from the Nociception Signal Transduction Laboratory, Department of Anesthesiology, Tri-service General Hospital and National Defense Medical Center, Taipei, Taiwan. Submitted for publication March 10, 2010. Accepted for publication June 30, 2010. Supported by a grant from the National Science Council, Taipei, Taiwan (NSC 97-2321-B-016-003-MY2).

Address correspondence to Dr. Wong: Department of Anesthesiology, Cathay General Hospital, 280 Renai Rd. Sec.4, Taipei, Taiwan. w82556@gmail.com. Information on purchasing reprints may be found at [www.anesthesiology.org](http://www.anesthesiology.org) or on the masthead page at the beginning of this issue. ANESTHESIOLOGY's articles are made freely accessible to all readers, for personal use only, 6 months from the cover date of the issue.

OPIOIDS, such as morphine, are a class of powerful analgesics used for treating moderate to severe pain in the clinic. However, long-term administration induces tolerance, which hampers their clinical use.<sup>1</sup> Morphine tolerance is a complex physiologic response; in addition to opioid receptor uncoupling and endocytosis/desensitization,<sup>2,3</sup> glutamatergic receptor activation and neuroinflammation has been demonstrated by ourselves and others.<sup>4–7</sup>

The excitatory amino acids (EAAs), glutamate and aspartate, are the principal excitatory neurotransmitters in the central nervous system and have a variety of functions, including nociceptive transmission and modification.<sup>8</sup> The glutamatergic receptor system, especially the *N*-methyl-D-aspartate (NMDA) receptor, plays an important role in synaptic plasticity and chronic pain formation.<sup>9</sup> NMDA receptors are tetrameric hetero-oligomers consisting of the essential NR1 subunit and one or more modulatory

NR2A-D and NR3 subunits. Activation of spinal NMDA receptors plays a crucial role in the development of morphine tolerance.<sup>4,10</sup> Pharmacological blockade of NMDA receptors or disruption of the NR1 subunit gene significantly attenuates morphine tolerance,<sup>11,12</sup> suggesting an involvement of NMDA receptors in morphine tolerance.

P2X receptors are a family of ligand-gated ion channels activated by extracellular adenosine 5'-triphosphate (ATP) that are involved in pain mechanisms.<sup>13</sup> The P2X<sub>3</sub> and P2X<sub>2/3</sub> receptors located on primary afferent nerve terminals in the inner lamina II of the spinal cord play a significant role in neuropathic and inflammatory pain.<sup>14,15</sup> A number of studies have demonstrated the therapeutic potential of modulating P2X receptors in treating neuropathic pain.<sup>16</sup> Intrathecal administration of ATP produces long lasting allodynia, probably through P2X<sub>2/3</sub> receptors.<sup>17</sup> Studies using gene knockout, antisense oligonucleotides, or the selective P2X<sub>3</sub> antagonist A-317491 indicate that ATP and P2X<sub>3</sub> receptors are involved in chronic pain, particularly chronic inflammatory and neuropathic pain.<sup>15,18–20</sup> McGaraughty *et al.*<sup>21</sup> reported that antagonism of P2X<sub>3</sub> and P2X<sub>2/3</sub> receptors reduces inflammatory hyperalgesia and chemogenic nociception, possibly through the spinal opioid receptor system. Mao *et al.*<sup>22</sup> suggested that neuropathic pain and morphine tolerance share common mechanisms of nociception sensitization and morphine resistance. The present study examined the effect of the P2X receptor antagonist 2',3'-O-(2,4,6-trinitrophenyl)-ATP (TNP-ATP) on morphine tolerance and its possible mechanism.

## Materials and Methods

### Animal Preparation and Intrathecal Drug Delivery

All experiments conformed to the Guiding Principles in the Care and Use of Animals of the American Physiology Society and were approved by the National Defense Medical Center Animal Care and Use Committee (National Defense Medical Center, Taipei, Taiwan). Intrathecal catheters and microdialysis probe implantation were performed as described previously.<sup>7</sup> In brief, male Wistar rats (350–400 g) were anesthetized with phenobarbital (60 mg/kg, intraperitoneally) and implanted with two intrathecal catheters (8.5 cm) with or without a microdialysis loop probe *via* the atlanto-occipital membrane down to the lumbar enlargement L1–L2 of the spinal bony structure. The levels of L1–L2 spinal bony structure correspond to the spinal cord segments of L5, L6, and S1–S3, which are responsible for the tail-flick reflex.<sup>23</sup> One intrathecal catheter was connected to a mini-osmotic pump for infusion of saline (1  $\mu$ l/h) (Sal rats) or morphine (15  $\mu$ g/h) (MO rats) for 5 days, whereas the other was used for the subsequent injection of saline (Sal/Sal or MO/Sal rats) or TNP-ATP (Sal/TNP-ATP or MO/TNP-ATP rats) or ifenprodil (Sal/IFE or MO/IFE rats). On day 5 after development of morphine tolerance, the rats were injected with either TNP-ATP (50  $\mu$ g or 12.5–50  $\mu$ g as indicated) or saline (as control) or ifenprodil (10  $\mu$ g/5  $\mu$ l, intrathecally),

then 30 min later, a single dose of morphine (15  $\mu$ g/5  $\mu$ l, intrathecally) was injected and its antinociceptive effect measured. All rats were maintained on a 12-h light/dark cycle with food and water freely available. Rats with neurologic deficits were excluded from the study. All drugs were purchased from Sigma (St. Louis, MO). Preliminary results showed no abnormal motor function after intrathecal injection of test drugs (data not shown).

### Construction of the Spinal Cord Microdialysis Probe

The technique for spinal microdialysis probe construction was modified from that in a previous study.<sup>24</sup> The probe was constructed using two 7-cm PE5 tubes (0.008 inch ID, 0.014 inch OD; Spectranetics, Colorado Springs, CO) and a 4.2-cm cuprophane hollow fiber (Hospal Co, Lyon, France). A Formvar-insulated Nichrome wire (0.0026 inch outer diameter; A-M System, Everett, WA) was passed through a polycarbonate tube (194  $\mu$ m OD, 102  $\mu$ m ID; 0.7 cm in length) and the cuprophane hollow fiber (active dialysis region), which was then connected to a PE5 catheter using epoxy glue. The middle portion of the cuprophane hollow fiber was bent to form a U-shaped loop, and both ends of the dialysis loop, which consisted of silastic tubes, were sealed with silicone. The dead space of the dialysis probe was 8  $\mu$ l. During *in vitro* measurements, the recovery rates of the probes were around 40% at an infusion rate of 5  $\mu$ l/min.

### Behavioral Tests

The tail-flick latency was measured using the hot water immersion test ( $52 \pm 0.5^\circ\text{C}$ ) with the rats placed in plastic restrainers. The average baseline tail-flick latency was  $2 \pm 0.5$  s in naive rats, and the cut-off time was 10 s. The percentage of the maximal possible antinociceptive effect was calculated as (maximum latency – baseline latency)/(cut off latency – baseline latency)  $\times$  100. Antinociceptive dose-response curves were constructed for each study group.

### Cerebrospinal Fluid Sample Collection and Measurement of Excitatory Amino Acids

One of the externalized silastic tubes was connected to a syringe pump (CMA Microdialysis AB, Solna, Sweden) and perfused with Ringer's solution (8.6 mg/ml NaCl, 0.33 mg/ml CaCl<sub>2</sub>, and 0.3 mg/ml potassium chloride). The cerebrospinal fluid (CSF) dialysates were collected from the other externalized silastic tube of the microdialysis probe using a standard procedure of a 50 min washout period, followed by a 30-min sample collection period at a flow rate of 5  $\mu$ l/min in a polypropylene tube on ice, and were frozen at  $-80^\circ\text{C}$  until assayed. The concentrations of EAAs were measured by phenylisothiocyanate derivatization using a high-performance liquid chromatography (Agilent 1100; Agilent Technologies, Santa Clara, CA) with a reversed-phase ZORBAX Eclipse amino acid analysis column ( $4.6 \times 150$  mm<sup>2</sup>, 3.5  $\mu$ m) and fluorescent detector (Gilson model 121, set at 428 nm), as described previously.<sup>25</sup> External standards (authentic amino acids at concentrations of 156.25,

312.5, 625, 1,250, and 2,500  $\mu\text{M}$ ) were run at the beginning and end of each sample group. Peak heights were normalized to the standard peaks and quantified based on the linear relationship between peak height and the amount of the corresponding standard.

### **Preparation of Spinal Cord Total Lysate and Synaptosomal Membrane and Cytosolic Fractions and Western Blot Analysis**

After drug treatment, as described in the animal preparation and intrathecal drug delivery section, rats were sacrificed by exsanguination under isoflurane (ABBOTT, Abbott Laboratories Ltd., Queenborough, Kent, United Kingdom) anesthesia and the laminectomy was performed at the lower edge of the 12th thoracic vertebra (L1–L2 spinal bony structure) and the lumbar enlargement of the spinal cord immediately removed and stored at  $-80^{\circ}\text{C}$  until used for Western blotting. To prepare a total lysate, the dorsal portion of the lumbar spinal cord enlargement was homogenized in ice-cold lysis buffer (50 mM Tris, pH 7.5, 150 mM NaCl, 2% Triton X-100, 100  $\mu\text{g}/\text{ml}$  phenylmethylsulfonyl fluoride, 1  $\mu\text{g}/\text{ml}$  aprotinin, and phosphatase inhibitors), the lysate centrifuged at 12,000g for 30 min at  $4^{\circ}\text{C}$ , and the supernatant used for Western blotting. To prepare cellular fractions, the dorsal portion of the lumbar spinal cord enlargement was fractionated into cytosolic, membrane, and nuclear fractions using a Cytoplasmic, Nuclear, and Membrane compartment protein extraction kit, as recommended by the manufacturer (Biochain Institute, Inc., Hayward, CA). The membrane and cytosolic fractions were checked for specificity by Western blotting with mouse anti-rat epidermal growth factor receptor (1:2,000; MBL, Naka-ku Nagoya, Japan) and anti-rat  $\alpha$ -tubulin antibodies (1:5,000; Laboratory Frontier, Seodaemun-gu, Seoul, Korea), respectively. The protein concentrations of the samples were determined by the bicinchoninic acid assay (Pierce; Thermo Fisher Scientific Inc., Waltham, MA) using bovine serum albumin as the standard. Samples containing 20  $\mu\text{g}$  of protein were adjusted to a similar volume with loading buffer (10% sodium dodecyl sulfate, 20% glycerol, 125 mM Tris, 1 mM EDTA, 0.002% bromophenol blue, 10%  $\beta$ -mercaptoethanol) and the proteins denatured by heating at  $95^{\circ}\text{C}$  for 5 min, separated on 10% sodium dodecyl sulfate-polyacrylamide gels, and transferred onto polyvinylidene difluoride membranes (Millipore, Billerica, MA). The membranes were blocked with 5% nonfat milk in Tris-Tween buffer saline (50 mM Tris-HCl, 154 mM NaCl, and 0.05% Tween 20, pH 7.4), incubated overnight at  $4^{\circ}\text{C}$  with polyclonal rabbit antibodies against rat NR1, NR2A, NR2B, GluR1, or GluR2 (all 1:1,000 dilution in 5% nonfat milk in Tris-Tween buffer saline) or monoclonal mouse anti-rat postsynaptic density-95 antibodies (PSD-95; 1:5,000 dilution in 5% nonfat milk in Tris-Tween buffer saline) (all from Millipore), then incubated for 1 h at room temperature with horseradish peroxidase-conjugated donkey anti-rabbit or anti-mouse immunoglobulin G antibodies, as appropriate (1:2,000 in 5% nonfat milk in Tris-Tween buffer saline)

(Jackson ImmunoResearch, West Grove, PA). Membrane-bound secondary antibodies were detected using Chemiluminescence<sup>plus</sup> reagent (Perkin Elmer Life and Analytical Sciences, Waltham, MA) and visualized using a chemiluminescence imaging system (Syngene, Cambridge, United Kingdom). Finally, the blots were incubated for 18 min at  $56^{\circ}\text{C}$  in stripping buffer (62.6 mM Tris-HCl, pH: 6.7, 2% sodium dodecyl sulfate, 100 mM mercaptoethanol) and reprobed with monoclonal mouse anti- $\beta$ -actin antibody (1:5,000; Sigma) as a loading control. The Western blot analysis was repeated three times. The density of each specific band was measured using a computer-assisted imaging analysis system (Gene Tools Match software; Syngene, Cambridge, United Kingdom).

### **Immunoprecipitation of PSD-95/NR1 and NR2B Subunits Complex**

To determine the coassembly of PSD-95, NR1, and NR2B subunits, the coimmunoprecipitation experiments were performed by using immobilized anti-PSD-95 antibody. Anti-PSD-95 antibody (1:50; Cell Signaling, Danvers, MA) was covalently cross-linked to Dynabeads<sup>®</sup> protein A (Invitrogen, Carlsbad, CA) according to the manufacturer's instructions. The PSD-95/NR1 and NR2B complexes were isolated by incubating 200  $\mu\text{g}$  of spinal cord dorsal horn membrane proteins solubilized in Cytoplasmic, Nuclear, and Membrane compartment protein extraction kit extraction buffer with 50  $\mu\text{l}$  of Dynabeads<sup>®</sup> protein A for 1 h at room temperature. The incubation performed with normal mouse serum was used as a negative control. Dynabeads<sup>®</sup> were precipitated using a magnet, and then the beads were extensively washed with phosphate-buffered saline. Precipitated proteins were eluted with 50  $\mu\text{l}$  sodium dodecyl sulfate-containing sample buffer, and 20  $\mu\text{l}$  of the samples were used for Western blots as described above in Preparation of Spinal Cord Total Lysate and Synaptosomal Membrane and Cytosolic Fractions and Western Blot Analysis.

### **Fluorescence Immunocytochemistry and Image Analysis**

For fluorescence immunocytochemistry, the lumbar spinal cord was postfixed overnight at  $4^{\circ}\text{C}$  in 4% paraformaldehyde prepared in 0.1 M phosphate buffer, pH 7.4, then cryoprotected in 30% sucrose for 2 days. It was confirmed as lumbar spinal cord by the cross anatomy, which showed nearly a circular shape with very large anterior and posterior gray horns and relatively little white matter. Sections (5  $\mu\text{m}$ ) were prepared, air-dried on microscope slides for 30 min at room temperature, and preincubated for 1 h with 4% normal goat serum in phosphate-buffered saline containing 0.01% Triton X-100. After three washes in ice-cold phosphate-buffered saline, the sections were incubated overnight at  $4^{\circ}\text{C}$  with unlabeled mouse monoclonal anti-rat  $\beta$ -III tubulin (Santa Cruz Biotechnology, Inc., Santa Cruz, CA; 1:100 dilution in phosphate buffered saline with Triton X-100 containing 2% normal goat serum) and rabbit polyclonal antibodies anti-rat NR1 or NR2B (both from Millipore; 1:500 dilution in phosphate buffered saline with Triton X-100 containing 2% normal goat serum). The sections were then reacted for



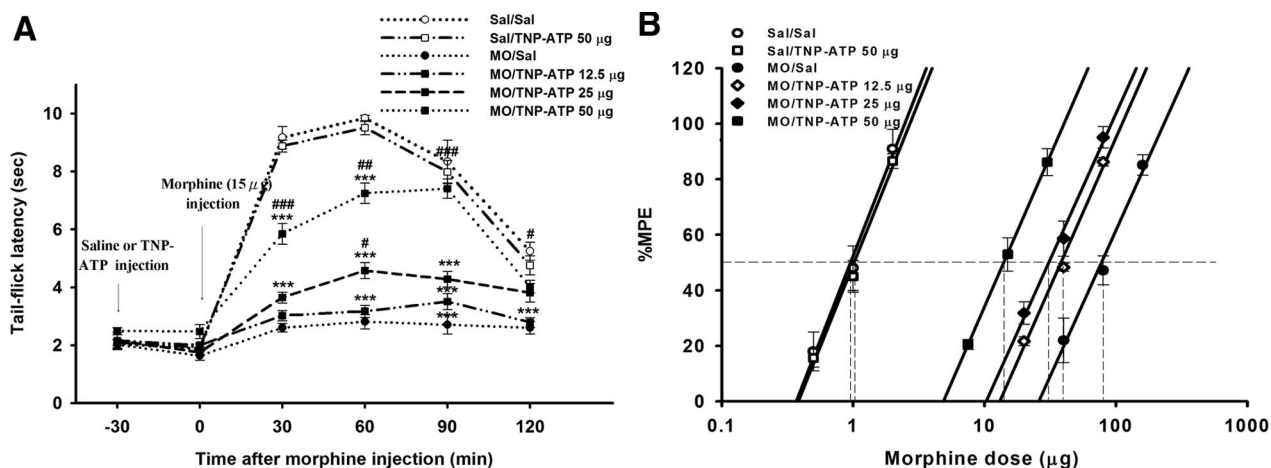

**Fig. 1.** 2',3'-O-(2,4,6-Trinitrophenyl) adenosine 5'-triphosphate (TNP-ATP) restores the antinociceptive effect of morphine in morphine-tolerant rats. (A) The antinociceptive effect of morphine was examined on day 5 after intrathecal infusion of either saline (1  $\mu$ l/h) or morphine (15  $\mu$ g/h). At 3 h after discontinuation of infusion, the rats were injected with either saline (5  $\mu$ l) or TNP-ATP (12.5, 25, and 50  $\mu$ g/5  $\mu$ l) 30 min before morphine challenge (15  $\mu$ g/5  $\mu$ l), at which time the tail-flick latencies had returned to less than 3 s, then the tail-flick latency was measured every 30 min for 120 min. (B) Dose-response curves of the antinociceptive effect of morphine were constructed from the tail-flick test results performed on day 5. The mini-osmotic pump was disconnected for 3 h by which time the tail-flick latency had reached baseline, then different doses of morphine (0.5, 1, 2  $\mu$ g for Sal/Sal and Sal/TNP-ATP 50  $\mu$ g rats; 40, 80, 160  $\mu$ g for MO/Sal rats; 20, 40, 80  $\mu$ g for MO/TNP-ATP 12.5 and 25  $\mu$ g rats; 7.5, 15, 30  $\mu$ g for MO/TNP-ATP 50  $\mu$ g rats) were given to rats intrathecally. The dose-response effect is expressed as the percentage of the maximal possible antinociceptive effect. The AD<sub>50</sub> of morphine was 1.12  $\mu$ g in Sal/Sal rats (95% confidence interval [CI], 1.0–1.3  $\mu$ g), 1.19  $\mu$ g in Sal/TNP-ATP 50  $\mu$ g rats (95% CI, 1.0–1.4  $\mu$ g), 90.51  $\mu$ g in MO/Sal rats (95% CI, 81.3–104.5  $\mu$ g), 46.54  $\mu$ g in MO/TNP-ATP 12.5  $\mu$ g rats (95% CI, 39.6–52.5  $\mu$ g), 35.19  $\mu$ g in MO/TNP-ATP 25  $\mu$ g rats (95% CI, 30.1–57.9  $\mu$ g), and 16.35  $\mu$ g in MO/TNP-ATP 50  $\mu$ g rats (95% CI, 13.2–22.8  $\mu$ g) ( $n$  = 12 of each group). \*\*\*  $P$  < 0.001 compared with the Sal/Sal group; ###  $P$  < 0.001, ##  $P$  < 0.01, and #  $P$  < 0.05 compared with the MO/Sal group. All data points are presented as the mean  $\pm$  SEM. MO/Sal = morphine infusion for 5 days plus saline injection on day 5 ( $n$  = 12); MO/TNP-ATP 12.5  $\mu$ g = morphine infusion for 5 days plus TNP-ATP (12.5  $\mu$ g/5  $\mu$ l) injection on day 5 ( $n$  = 8); MO/TNP-ATP 25  $\mu$ g = morphine infusion for 5 days plus TNP-ATP (25  $\mu$ g/5  $\mu$ l) injection on day 5 ( $n$  = 8); MO/TNP-ATP 50  $\mu$ g = morphine infusion for 5 days plus TNP-ATP (50  $\mu$ g/5  $\mu$ l) injection on day 5 ( $n$  = 12); Sal/Sal = saline infusion for 5 days plus saline injection on day 5 ( $n$  = 6); Sal/TNP-ATP 50  $\mu$ g = saline infusion for 5 days plus TNP-ATP (50  $\mu$ g/5  $\mu$ l) injection on day 5 ( $n$  = 9).

1 h at room temperature with rhodamine-labeled goat anti-rabbit immunoglobulin G antibodies (red fluorescence) and fluorescein isothiocyanate-labeled donkey anti-mouse immunoglobulin G antibodies (green fluorescence) (both from Jackson ImmunoResearch) and images were captured using an Olympus BX 50 fluorescence microscope (Olympus, Optical, Tokyo, Japan) and a  $\delta$  Vision disconsolation microscopic system operated by SPOT software (Diagnostic Instruments Inc., Sterling Heights, MI). The laser wavelength was set at 488 nm for fluorescein isothiocyanate fluorescence and 568 nm for rhodamine fluorescence. Controls without primary antibody were run to confirm that the staining was specific.

### Data and Statistical Analysis

All data are presented as the mean  $\pm$  SEM. The statistical analysis was performed using SigmaStat 3.0 software (SYSTAT Software Inc., San Jose, CA). The appropriate paired  $t$  test (two-tailed) or analysis of variance (ANOVA) was used to determine the statistical significance with a criterion of  $P$  less than 0.05. Tail-flick latencies and EAA concentration were analyzed using two-way (time and treatment) ANOVA followed by subsequent one-way ANOVA (at each time of the experiment) with a *post hoc* Student-Newman-Keuls test. Values for the analgesic dose of 50% of the maximal possible antinociceptive effect (AD<sub>50</sub>) were analyzed using a computer-assisted linear regres-

sion program SigmaPlot 10.0 (SYSTAT Software Inc.). The 95% CI was calculated using the pharmacologic calculations system PHARM/PCS version 4.2 (MicroComputer Specialists, Philadelphia, PA). For immunoreactivity data, the intensity of each test band was expressed as the optical density relative to that of the average optical density for the corresponding control band. For statistical analysis, immunoreactivity was analyzed by one-way ANOVA, followed by multiple comparisons with the Student-Newman-Keuls *post hoc* test.

## Results

### Treatment with the P2X Receptor Antagonist TNP-ATP Restores the Antinociceptive Effect of Morphine in Morphine-tolerant Rats

As in our previous study, morphine challenge (15  $\mu$ g/5  $\mu$ l, intrathecally) on day 5, at 3 h after discontinuation of drug infusion, produced a significant antinociceptive effect in saline-infused rats (Sal/Sal) ( $P$  < 0.001) but not in morphine-tolerant rats (MO/Sal) ( $P$  = 0.95) (fig. 1A). TNP-ATP alone did not produce an antinociceptive effect in either saline-infused controls ( $p$  = 0.502) or morphine-tolerant rats ( $p$  = 0.962). However, treatment with TNP-ATP (12.5, 25, 50  $\mu$ g/5  $\mu$ l, intrathecally) 30 min before morphine challenge (MO/TNP-ATP) dose-dependently restored the antinociceptive ef-

fect in morphine-tolerant rats ( $P < 0.001$ ). The two-way ANOVA of these time-course curves showed significant difference in tail-flick latency by treatments, by time, and for the interactions ( $P < 0.001$ ). High-dose TNP-ATP (100  $\mu\text{g}/5 \mu\text{l}$ ) treatment produced antinociceptive effects similar to those of TNP-ATP 50  $\mu\text{g}$  treatment in morphine-tolerant rats (data not shown). As shown in figure 1B, TNP-ATP treatment 30 min before morphine injection had no effect on the morphine dose-response curve in saline-infused rats (Sal/TNP-ATP), the  $\text{AD}_{50}$  being 1.12  $\mu\text{g}$  in Sal/Sal rats and 1.19  $\mu\text{g}$  in Sal/TNP-ATP rats. In morphine-tolerant rats, the morphine dose-response curve was shifted to the right by 81-fold ( $\text{AD}_{50}$  of 90.51  $\mu\text{g}$ ) compared with in saline-infused rats, and TNP-ATP (50  $\mu\text{g}$ ) treatment restored the antinociceptive effect of morphine in morphine-tolerant rats, shifting the  $\text{AD}_{50}$  from 90.51 (MO/Sal) to 16.35  $\mu\text{g}$  (MO/TNP-ATP). Treatment with lower doses of TNP-ATP, either 12.5 or 25  $\mu\text{g}$ , showed slightly restored morphine's antinociceptive effect in morphine-tolerant rats, with  $\text{AD}_{50}$  of 46.54 and 35.19  $\mu\text{g}$ , respectively.

#### Effect of TNP-ATP on Levels of NMDA Receptor Subtypes in the Total Lysate and the Synaptosomal Membrane of Morphine-tolerant Rats

As shown in figure 2, immunoblot analysis showed that levels of NR1, NR2A, and NR2B in the spinal cord dorsal horn lysate from saline-infused rats (Sal/Sal) were unaffected by TNP-ATP treatment (Sal/TNP-ATP) (NR1,  $P = 0.057$ ; NR2A,  $P = 0.126$ ; and NR2B,  $P = 0.957$ ). On day 5, long-term morphine infusion up-regulated levels of NR1 and NR2B subunits in the total lysate by approximately 50–100% (MO/Sal), and this effect was not prevented by TNP-ATP treatment (MO/TNP-ATP) ( $P < 0.001$ ). As shown in figure 3, in morphine-tolerant rats (MO/Sal), cytosolic levels of NR1 and NR2B were no different from those in saline-infused (Sal/Sal) or saline-infused TNP-ATP-treated (Sal/TNP-ATP) rats. However, TNP-ATP treatment significantly increased cytosolic levels of NR1 and NR2B subunits in morphine-tolerant rats (MO/TNP-ATP) compared with the other groups ( $P < 0.001$ ). In contrast, as shown in figure 3, right and bottom, increased levels of NR1 and NR2B subunits were seen in the synaptosomal membrane in morphine-tolerant rats (compare MO/Sal with Sal/Sal) ( $P < 0.001$ ), and this effect was prevented by TNP-ATP treatment (MO/TNP-ATP) ( $P < 0.001$ ). Expression of the  $\alpha$ -amino-3-hydroxyl-5-methyl-4-isoxazole-propionate receptor GluR1 and GluR2 subunits in the cytosolic and synaptosomal membrane fractions was not affected by any of the treatments (data not shown) ( $P = 0.672$  and  $0.624$ , respectively). Epidermal growth factor receptor and  $\alpha$ -tubulin markers were used to confirm the identity of the membrane and cytosolic fractions (fig. 3). Fluorescence microscopy localization of the NR1 and NR2B subunits is shown in figures 4 and 5, respectively. In morphine-tolerant rats, a robust and extensive NR1 and NR2B subunit labeling was evenly distributed throughout the entire neuron (MO/Sal), whereas labeling was cytosolic after TNP-ATP treatment (MO/TNP-ATP).

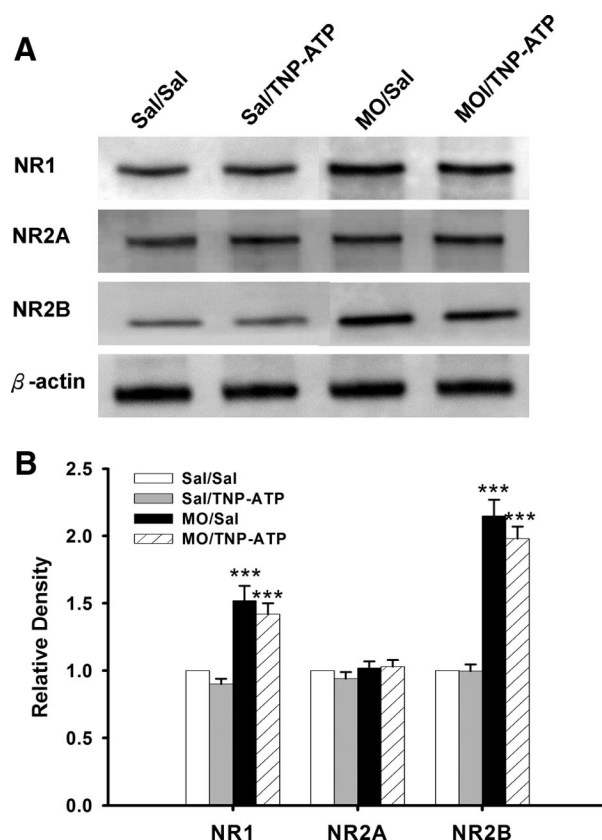

**Fig. 2.** Levels of *N*-methyl-D-aspartate receptors in the dorsal horn of the spinal cord after various treatments. Western blots for the NR1, NR2A, and NR2B subunits were performed on the rat spinal cord dorsal horn lysates. (A) Typical blots show expression of NR1, NR2A, and NR2B protein in the spinal cord dorsal horn of the four groups ( $n = 5$  of each group).  $\beta$ -Actin was used as the loading control. (B) Pooled densitometric results for NR1, NR2A, and NR2B, with the control band intensity assigned the value of 1. \*\*\*  $P < 0.001$  compared with the Sal/Sal group. MO/Sal = morphine (15  $\mu\text{g}/\text{h}$ ) infusion for 5 days plus saline (5  $\mu\text{l}$ ) injection; MO/TNP-ATP = morphine (15  $\mu\text{g}/\text{h}$ ) infusion for 5 days plus TNP-ATP (50  $\mu\text{g}/5 \mu\text{l}$ ) injection; Sal/Sal = saline (1  $\mu\text{l}/\text{h}$ ) infusion for 5 days plus saline (5  $\mu\text{l}$ ) injection; Sal/TNP-ATP = saline (1  $\mu\text{l}/\text{h}$ ) infusion for 5 days plus TNP-ATP (50  $\mu\text{g}/5 \mu\text{l}$ ) injection; TNP-ATP = 2',3'-O-(2,4,6-trinitrophenyl) adenosine 5'-triphosphate.

#### NR1/NR2B Antagonist Ifenprodil Treatment Attenuated the Antinociceptive Tolerance of Morphine

As shown in figure 6, on day 5, 3 h after discontinuation of morphine infusion, morphine challenge (15  $\mu\text{g}$ ) did not produce antinociceptive effect in morphine-tolerant rats (MO/Sal) ( $P = 0.934$ ), whereas a significant antinociceptive effect was observed in saline-infused rats (Sal/Sal) ( $P < 0.001$ ). However, treatment with ifenprodil (10  $\mu\text{g}$ , intrathecally) 30 min before morphine challenge preserved its antinociceptive effect in morphine tolerant rats (compare MO/IFE with MO/Sal) ( $P < 0.001$ ). Ifenprodil alone had no antinociceptive effect in either saline-infused control rats ( $P = 0.543$ ) or morphine-tolerant rats ( $P = 0.1$ ). As shown in figure 6B, the dose-response showed that the  $\text{AD}_{50}$  for morphine was 1.12  $\mu\text{g}$  in Sal/Sal rats and 1.13  $\mu\text{g}$  in Sal/IFE rats. In morphine-tolerant rats, morphine's dose-

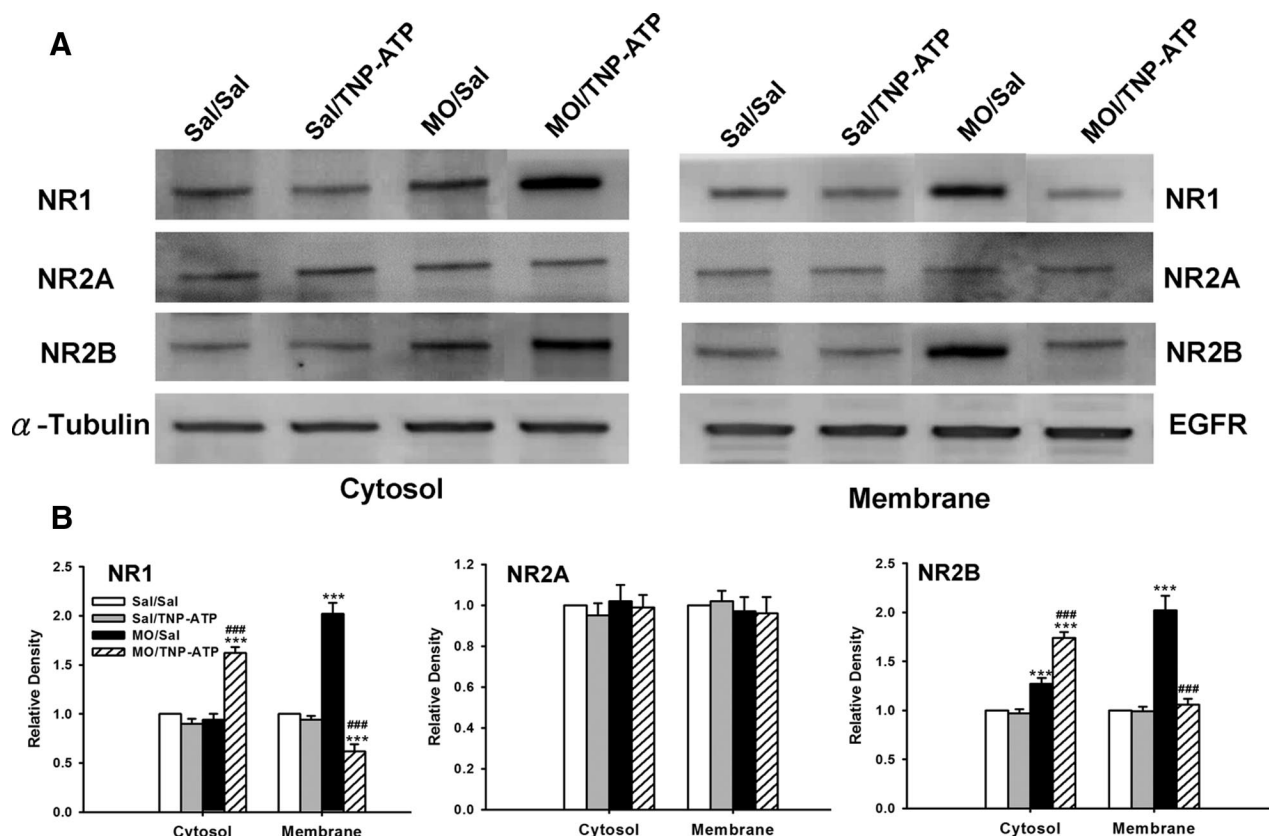

**Fig. 3.** 2',3'-O-(2,4,6-Trinitrophenyl) adenosine 5'-triphosphate (TNP-ATP) has different effects on the expression of *N*-methyl-D-aspartate receptors in the cytosolic and synaptosomal membrane fractions of morphine-tolerant rats. (A) Western blot analysis of NR1, NR2A, and NR2B performed on the cytosolic and synaptosomal membrane fractions of the spinal cord dorsal horn from saline-infused or morphine-infused rats injected with saline or TNP-ATP. Anti-tubulin and anti-epidermal growth factor receptor antibodies were used as the loading marker for the cytosolic and synaptosomal membrane fraction, respectively. (B) Densitometric measurements from five independent experiments were pooled and the band intensity for the Sal/Sal rats was assigned a value of 1. EGFR = epidermal growth factor receptor; MO/Sal = morphine (15  $\mu$ g/h) infusion for 5 days plus saline (5  $\mu$ l) injection; MO/TNP-ATP = morphine (15  $\mu$ g/h) infusion for 5 days plus TNP-ATP (50  $\mu$ g/5  $\mu$ l) injection; Sal/Sal = saline (1  $\mu$ l/h) infusion for 5 days plus saline (5  $\mu$ l) injection; Sal/TNP-ATP = saline (1  $\mu$ l/h) infusion for 5 days plus TNP-ATP (50  $\mu$ g/5  $\mu$ l) injection. \*\*\*  $P < 0.001$  compared with the Sal/Sal group; ###  $P < 0.001$  compared with the MO/Sal group ( $n = 5$  of each group).

response curve was shifted to the right by 80-fold (MO/Sal,  $AD_{50} = 89.88 \mu$ g) compared with saline-infused rats (Sal/Sal,  $AD_{50} = 1.12 \mu$ g), and ifenprodil treatment potentiated the antinociceptive effect of morphine in morphine-tolerant rats, the  $AD_{50}$  were from 89.88 (MO/Sal) to 25.28  $\mu$ g (MO/IFE).

#### TNP-ATP Treatment Suppresses the Morphine Challenge-evoked EAA Release in Morphine-tolerant Rats

In the CSF microdialysis experiment, TNP-ATP treatment 30 min before morphine challenge had no significant effect on CSF EAA levels in either saline-infused controls (aspartate,  $P = 0.68$ ; glutamate,  $P = 0.338$ ) or morphine-tolerant rats (aspartate,  $P = 0.635$ ; glutamate,  $P = 0.074$ ). As shown in figure 7, morphine challenge had no effect on CSF EAA levels in either saline-infused (Sal/Sal) (aspartate,  $P = 0.658$ ; glutamate,  $P = 0.868$ ) or saline-infused plus TNP-ATP-treated (Sal/TNP-ATP) rats (aspartate,  $P = 0.949$ ; glutamate,  $P = 0.814$ ). As in our previous study,<sup>6,7</sup> morphine challenge resulted in a significant increase in aspartate and glutamate release in morphine-tolerant

rats (MO/Sal) ( $P < 0.001$ ), and TNP-ATP treatment 30 min before morphine challenge completely blocked this morphine-evoked EAAs release in morphine-tolerant rats (MO/TNP-ATP) ( $P < 0.001$ ). Two-way ANOVA of these time-course curves showed significant difference in EAA concentrations by treatments, by time, and for the interactions ( $P < 0.001$ ).

#### TNP-ATP Treatment Down-regulates Synaptosomal Membrane PSD-95 Expression in Morphine-tolerant Rats

In figure 8, the density of the PSD-95 band on immunoblots of the synaptosomal membrane fraction from the saline-infused rat spinal cord dorsal horn (Sal/Sal) is expressed as 1. TNP-ATP treatment alone had no effect on PSD-95 expression in saline-infused rats (compare Sal/TNP-ATP and Sal/Sal). Long-term morphine infusion increased (by approximately 100%) synaptosomal membrane PSD-95 expression (MO/Sal) ( $P < 0.001$ ) and this effect was not only prevented by TNP-ATP treatment (MO/TNP-ATP), but PSD-95 expression was lower than in the saline controls ( $P < 0.001$ ).



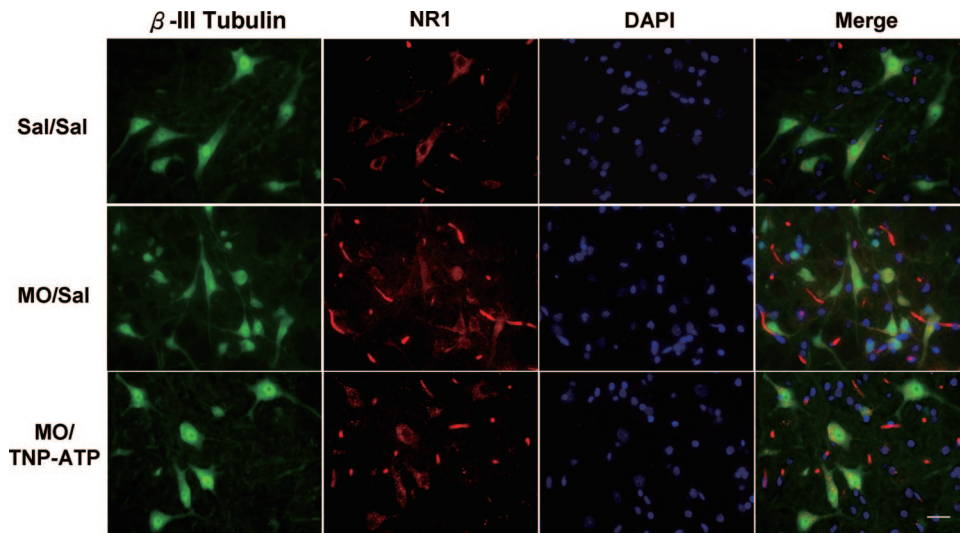

**Fig. 4.** 2',3'-O-(2,4,6-Trinitrophenyl) adenosine 5'-triphosphate (TNP-ATP) alters the distribution of *N*-methyl-D-aspartate receptor subunit NR1. The spinal cords from Sal/Sal rats and morphine-infused rats with or without TNP-ATP injection were fixed and labeled with either fluorescein isothiocyanate-labeled anti-beta-III tubulin antibody (green fluorescence for neuron) or rhodamine-labeled rabbit anti-NR1 antibody (red fluorescence) and 4',6-diamidino-2-phenylindole (label for nucleus, blue fluorescence), and images were obtained by immunofluorescent laser scanning fluorescence microscopy. These images are representative of multiple fields examined for each treatment from four independent immunofluorescence experiments. The scale bar represents 50  $\mu$ M ( $n = 4$  of each group). DAPI = 4',6-diamidino-2-phenylindole; Sal/Sal = saline (1  $\mu$ l/h) infusion for 5 days plus saline (5  $\mu$ l) injection; MO/Sal = morphine (15  $\mu$ g/h) infusion for 5 days plus saline (5  $\mu$ l) injection; MO/TNP-ATP = morphine (15  $\mu$ g/h) infusion for 5 days plus TNP-ATP (50  $\mu$ g/5  $\mu$ l) injection.

#### Effect of TNP-ATP Treatment on the Coassembly of PSD-95 and NR1 and NR2B Subunits

PSD-95 provides a physical means for anchoring of NMDA receptor at the postsynaptic site, and the coassembly of PSD-95 with NR1 and NR2B in morphine-tolerant rats was examined. As shown in figure 9, an increasing of the coassembly of three proteins was noted in the morphine-tolerant rat lumbar spinal cord ( $P < 0.001$ ). TNP-ATP treatment dose-dependently re-

verses the increasing of PSD-95, NR1 and NR2B expression in rats undergoing long-term intrathecal morphine infusion.

#### Discussion

In the present study, TNP-ATP treatment restored the antinociceptive effect of morphine and prevented the morphine-induced increase in aspartate and glutamate in the spinal CSF of morphine-tolerant rats. Moreover, we found

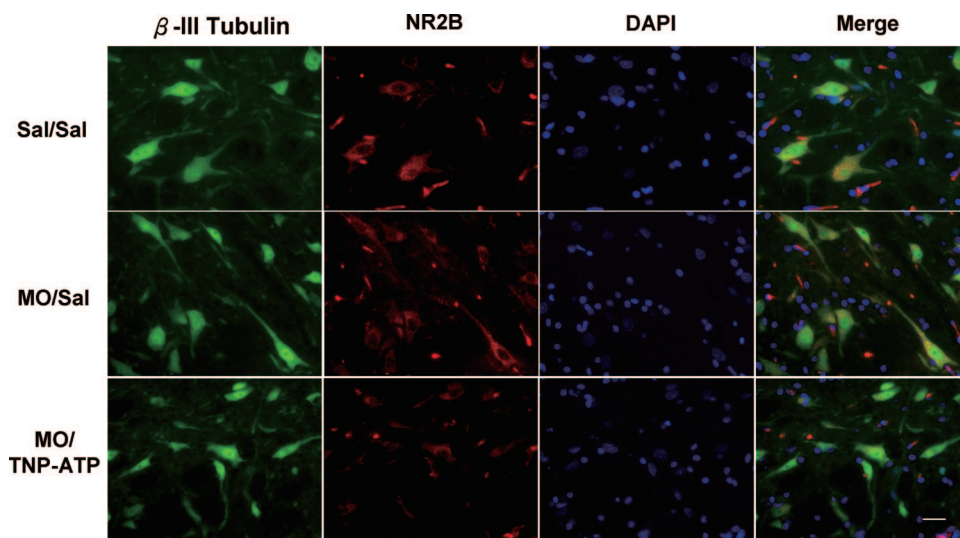

**Fig. 5.** 2',3'-O-(2,4,6-Trinitrophenyl) adenosine 5'-triphosphate alters the distribution of *N*-methyl-D-aspartate receptor subunit NR2B. The experiment is identical to that in figure 4 but using rabbit anti-NR2B antibody. These images are representative of multiple fields examined for each treatment from four independent immunofluorescence experiments. The scale bar represents 50  $\mu$ M ( $n = 4$  of each group). DAPI = 4',6-diamidino-2-phenylindole; TNP-ATP = 2',3'-O-(2,4,6-trinitrophenyl) adenosine 5'-triphosphate.

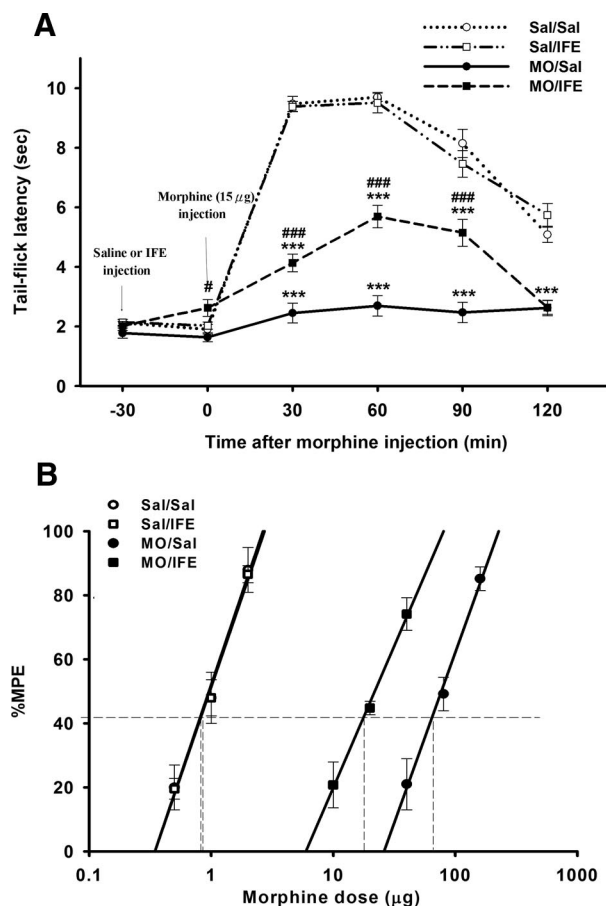

**Fig. 6.** Ifenprodil restores the antinociceptive effect of morphine in morphine-tolerant rats. (A) Morphine's antinociceptive effect was examined on day 5 after intrathecal saline (1 µl/h) or morphine (15 µg/h) infusion. At 3 h after discontinuation of infusion, rats were injected with either saline (5 µl) or ifenprodil (10 µg/5 µl) 30 min before morphine challenge (15 µg/5 µl), at which time the tail-flick latency returned to less than 3 s, then the tail-flick latency was measured every 30 min for 120 min. (B) Dose-response curves for the antinociceptive effect of the challenge morphine were constructed as described in figure 1. The AD<sub>50</sub> of morphine was 1.12 µg in saline-infused rats (95% confidence interval [CI], 1.0–1.3 µg), 1.13 µg in saline-infused rats pretreated with ifenprodil (95% CI, 1.0–1.3 µg), 89.88 µg in morphine-infused rats (95% CI, 77.6–112.3 µg), and 25.28 µg in morphine-infused rats pretreated with ifenprodil (10 µg) (95% CI, 20.9–34.1 µg). All data points are mean ± SEM (n = 12 of each group). \*\*\* *P* < 0.001 compared with the Sal/Sal group; ### *P* < 0.001, # *P* < 0.05 compared with the MO/Sal group. MO/Sal = morphine infusion for 5 days plus saline injection (n = 9); MO/IFE = morphine infusion for 5 days plus ifenprodil injection (n = 12); MPE = maximal possible antinociceptive effect; Sal/IFE = saline infusion for 5 days plus ifenprodil injection (n = 9); Sal/Sal = saline infusion for 5 days plus saline injection (n = 6).

that long-term morphine infusion up-regulated expression of the NMDA receptor NR1 and NR2B subunits in the total lysate of the lumbar enlargement of the spinal cord, and this was unaffected by TNP-ATP treatment. However, TNP-ATP treatment significantly increased the amount of cyto-

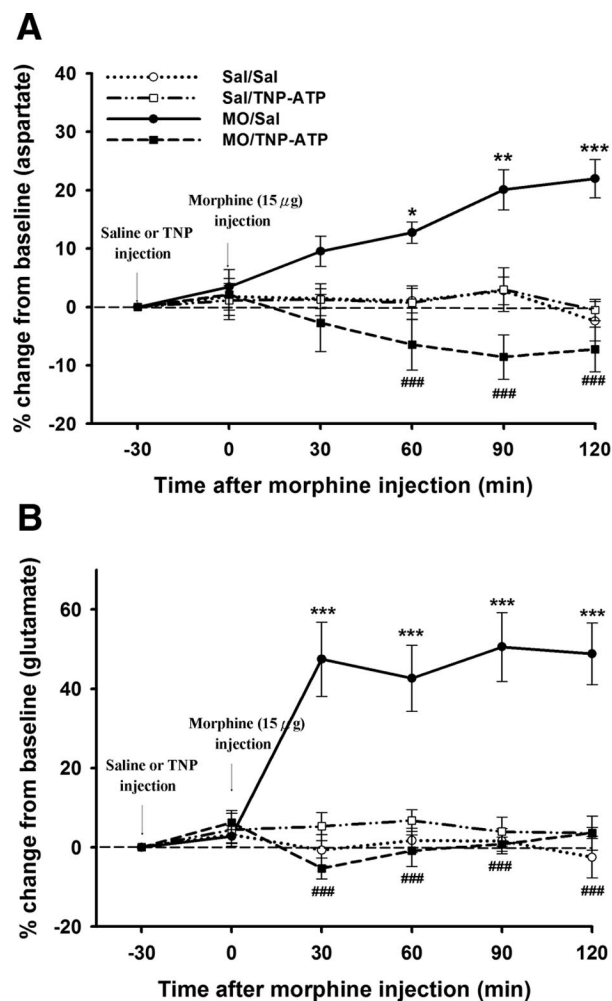

**Fig. 7.** 2',3'-O-(2,4,6-Trinitrophenyl) adenosine 5'-triphosphate suppresses the morphine-evoked excitatory amino acid release in morphine-tolerant rats. Rats were treated as in figure 1; then, after morphine challenge, cerebrospinal fluid dialysates were collected for measurement of aspartate (A) and glutamate (B). The average of the two consecutive CSF dialysates (30 min each) just before drug injection was used as the basal concentration (100%). Results are presented as the mean ± SEM of the % change from the control data. \*\*\* *P* < 0.001, \*\* *P* < 0.01, \* *P* < 0.05 compared with the Sal/Sal group; ### *P* < 0.001 compared with the MO/Sal group. MO/Sal, morphine (15 µg/h) infusion for 5 days plus saline (5 µl) injection (n = 10); MO/TNP-ATP, morphine (15 µg/h) infusion for 5 days plus TNP-ATP (50 µg/5 µl) injection (n = 10); Sal/Sal, saline (1 µl/h) infusion for 5 days plus saline (5 µl) injection (n = 6); Sal/TNP-ATP, saline (1 µl/h) infusion for 5 days plus TNP-ATP injection (50 µg/5 µl) (n = 6); TNP-ATP = 2',3'-O-(2,4,6-trinitrophenyl) adenosine 5'-triphosphate.

lic NR1 and NR2B; in contrast, it reversed the increase of NR1 and NR2B expression in the synaptosomal fraction of morphine-tolerant rat spinal cords. Moreover, treatment with NMDA receptor NR1/NR2B antagonist ifenprodil produced an effect similar to that of TNP-ATP; it also potentiated the antinociceptive effect of morphine. Therefore, the 5.5-fold leftward shift in the AD<sub>50</sub> of morphine in toler-



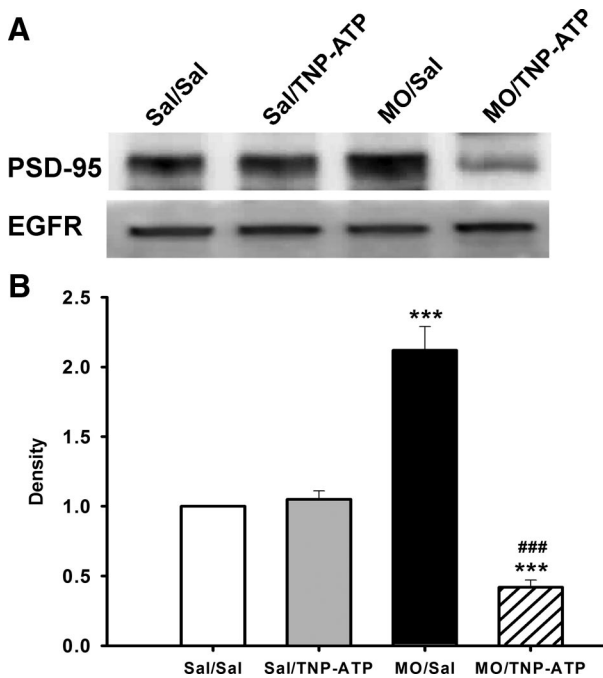

**Fig. 8.** 2',3'-O-(2,4,6-Trinitrophenyl) adenosine 5'-triphosphate treatment reverses the increase in postsynaptic density-95 (PSD-95) expression after long-term morphine infusion. (A) Western blot for PSD-95 in the synaptosomal membrane fraction of the different treatment groups; epidermal growth factor receptor was used as the internal standard. (B) Relative band densities of PSD-95 after the different treatments; the results are the mean  $\pm$  SEM ( $n = 4$  for each group). The band intensity of the Sal/Sal rats was assigned a value of 1. \*\*\*  $P < 0.001$  compared with the Sal/Sal group; ###  $P < 0.001$  compared with the MO/Sal group. EGFR = epidermal growth factor receptor; MO/Sal = morphine (15  $\mu$ g/h) infusion for 5 days plus saline (5  $\mu$ l) injection; MO/TNP-ATP = morphine (15  $\mu$ g/h) infusion for 5 days plus TNP-ATP (50  $\mu$ g/5  $\mu$ l) injection; PSD-95 = postsynaptic density-95; Sal/Sal = saline (1  $\mu$ l/h) infusion for 5 days plus saline (5  $\mu$ l) injection; Sal/TNP-ATP = saline (1  $\mu$ l/h) infusion for 5 days plus TNP-ATP (50  $\mu$ g/5  $\mu$ l) injection; TNP-ATP = 2',3'-O-(2,4,6-trinitrophenyl) adenosine 5'-triphosphate.

ant rats by TNP-ATP treatment might be *via* regulation of NMDA expression and synaptic excitatory amino acid concentration in morphine-tolerant rats. In addition, the up-regulation of PSD-95 in the synaptosomal fraction was also observed in the morphine-tolerant rat spinal cords, and this effect was reversed by TNP-ATP treatment. Quantification of the coprecipitated complex revealed that treatment of TNP-ATP dose-dependently down-regulates PSD-95, NR1, and NR2B expression in morphine-tolerant rats. Taken together, the treatment of TNP-ATP in inhibition of NMDA receptor NR1 and NR2B subunits expression on the postsynaptic membrane may be involved, at least in part, in the loss of PSD-95 expression.

Glutamate and aspartate have been shown to be involved in nociception transmission in the spinal cord.<sup>26</sup> In previous studies and our recent studies, the results failed to demonstrate an increase in CSF EAA levels during induction of

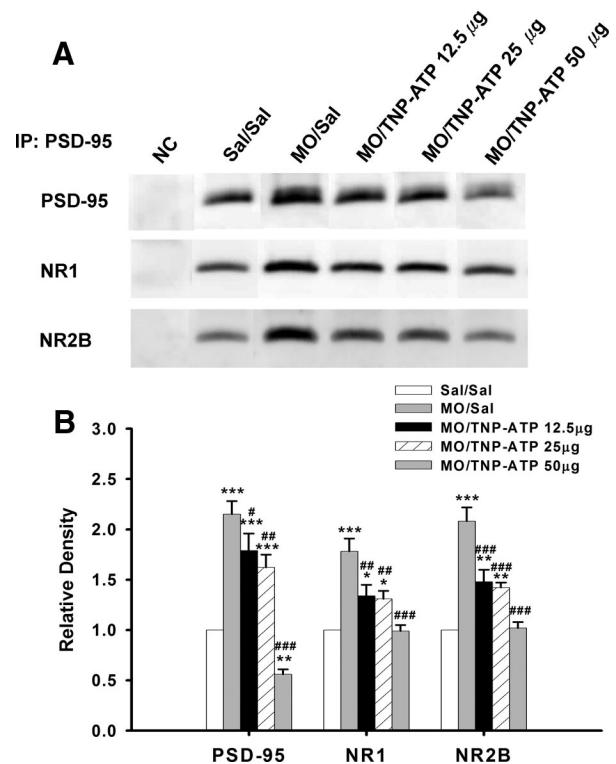

**Fig. 9.** 2',3'-O-(2,4,6-Trinitrophenyl) adenosine 5'-triphosphate dose-dependently down-regulates postsynaptic density-95 (PSD-95), NR1, and NR2B coprecipitated complex expression in morphine-tolerant rats. (A) Immunoprecipitation of PSD-95-NR1-NR2B complex in the synaptosome of different treatment groups. (B) Quantification of the coprecipitated complex density of different treatments. The results are expressed as mean  $\pm$  SEM ( $n = 4$  for each group). The band intensity of Sal/Sal rats was assigned a value of 1. \*\*\*  $P < 0.001$ , \*\*  $P < 0.01$ , \*  $P < 0.05$  compared with the Sal/Sal group; ###  $P < 0.001$ , ##  $P < 0.01$ , #  $P < 0.05$  compared with the MO/Sal group. IP = immunoprecipitation; NC = negative control; MO/Sal = morphine (15  $\mu$ g/h) infusion for 5 days plus saline (5  $\mu$ l) injection; MO/TNP-ATP 12.5  $\mu$ g = morphine (15  $\mu$ g/h) infusion for 5 days plus TNP-ATP (12.5  $\mu$ g/5  $\mu$ l) injection; MO/TNP-ATP 25  $\mu$ g = morphine (15  $\mu$ g/h) infusion for 5 days plus TNP-ATP (25  $\mu$ g/5  $\mu$ l) injection; MO/TNP-ATP 50  $\mu$ g = morphine (15  $\mu$ g/h) infusion for 5 days plus TNP-ATP (50  $\mu$ g/5  $\mu$ l) injection; Sal/Sal = saline (1  $\mu$ l/h) infusion for 5 days plus saline (5  $\mu$ l) injection; TNP-ATP = 2',3'-O-(2,4,6-trinitrophenyl) adenosine 5'-triphosphate.

morphine tolerance.<sup>7,27,28</sup> However, posttreatment with naloxone evoked a significant and time-dependent increase in the CSF dialysate glutamate and taurine concentration but not other amino acids in rats receiving long-term morphine infusion.<sup>27</sup> Likewise, we demonstrated that morphine challenge induced an increase of glutamate and aspartate in the CSF dialysates of morphine-tolerant rats; it was also accompanied by a loss of morphine's analgesic effect,<sup>7,28</sup> and coadministration of morphine with the NMDA antagonist not only attenuated morphine tolerance development but also blocked morphine-induced spinal EAAs release.<sup>28</sup> The sustained potentiation of NMDA receptor-mediated responses may be through  $\mu$ -opioid receptor-mediated protein kinase

C activation.<sup>29</sup> This evidence suggests a positive feedback control between opioid and glutamatergic receptors, particularly the NMDA receptors. It is known that long-term morphine infusion induces tolerance and  $G_i$ -protein uncoupling, and the morphine challenge in our present study may act *via*  $G_s$ -protein signal transduction and result in an excitatory effect of morphine on NMDA receptors.<sup>30,31</sup> Thus, the increase of EAA concentration by morphine challenge in the present study might be reflecting a direct action of morphine on NMDA receptor sensitization after long-term morphine exposure. Coadministration of morphine with various drugs, such as the NMDA antagonist MK-801, gabapentin, or amitriptyline, preserves the antinociceptive effect of morphine by lowering CSF EAA levels.<sup>7,28,32</sup> In the present study, we also found that short-term intrathecal morphine challenge induced an increase in glutamate and aspartate levels in tolerant rat spinal CSF dialysates and loss of the antinociceptive effect of morphine, and that TNP-ATP treatment prevented the morphine-evoked EAA increase in the CSF. These findings suggest that the restoration of the antinociceptive effect of morphine by TNP-ATP might partly result from a reduction in spinal EAA release.

Activation of NMDA receptors has been shown to play a crucial role in the development of tolerance to the analgesic effect of morphine.<sup>4</sup> Pharmacological analysis has demonstrated that blockade of NMDA receptor hyperfunction effectively prevents the development of morphine tolerance.<sup>33,34</sup> The competitive NMDA receptor antagonist LY274614 prevents antinociceptive tolerance to the highly selective  $\mu$ -opioid agonist [D-Ala<sup>2</sup>, N-Me-Phe<sup>4</sup>, Gly<sup>5</sup>-ol]-enkephalin.<sup>35</sup> In the present study, we also demonstrated that posttreatment with NMDA receptor specific antagonist ifenprodil (10  $\mu$ g) restored the antinociceptive effect of morphine in morphine-tolerant rats. Studies involving alterations in synaptic NMDA receptor expression, including antisense and transgenic knockdown of NMDA receptors, support the idea that NMDA receptor activation is important for morphine-induced plasticity and provide strong evidence that a unique pharmacological state is required for inhibition of behavioral adaptations.<sup>12,36</sup> Yang *et al.*<sup>37</sup> demonstrated that the amount of NMDA receptors at the synapse regulates synaptic responses and pain sensitivity. The present study showed that long-term morphine infusion increased NR1 and NR2B expression in the synapse and that this correlated with development of morphine tolerance, in agreement with a previous report that morphine tolerance is associated with time-dependent up-regulation of the NR1 subunit in the spinal cord dorsal horn compared with the saline control group.<sup>38</sup> It would seem that enhancement of NR1 expression at the synapse strengthens NMDA receptor-mediated synaptic transmission and thus increases NMDA receptor-evoked intracellular signals, leading to central sensitization and behavioral manifestations.<sup>12,39</sup> In morphine-tolerant rats, treatment with the P2X receptor antagonist TNP-ATP significantly decreased synaptic NR1 and NR2B subunit expression and decreased the morphine-evoked EAA

release and restored the antinociceptive effect. The rapid dynamic change in synaptic NR1/NR2B in neurons was associated with decreased PSD-95 expression.

The PSD protein family, including PSD-95, is critical for anchoring NMDA receptor NR2 subunits in the postsynaptic membrane and mediates the triggering of many physiologic and pathophysiological functions *via* NMDA receptor activation.<sup>40,41</sup> Previous studies have demonstrated a critical role for the interaction of PSD-95 with NMDA receptors in receptor trafficking to the neuron surface, synaptic localization, and intracellular signaling.<sup>42–44</sup> Cotransfection with PSD-95 and NR1/NR2A or NR1/NR2B subunit clones results in increased NR2A and NR2B subunit expression *via* interaction of the C-terminal threonine/serine/valine/valine motif of the NR2 subunit with PSD-95 and results in increased cell-surface expression of the assembled NR1/NR2A and NR1/NR2B subtypes.<sup>45–47</sup> In addition, binding of PSD-95 to the NR2B C-terminal serine/threonine-X-valine motif reduces receptor endocytosis from the neuron surface and stabilizes NR2B-containing NMDA receptors in the synapse,<sup>42,43</sup> thereby increasing the residence time of receptors at the cell surface. These studies suggest that PSD-95 plays a crucial role in the trafficking, membrane targeting, and internalization of NMDA receptor complexes. In our present study, PSD-95 expression was increased after long-term morphine infusion, and this effect was inhibited by short-term TNP-ATP treatment before morphine challenge. Quantification of the immunoprecipitated complex densities of PSD-95/NR1/NR2B revealed a significant increase in morphine-tolerant rats; this phenomenon was dose-dependently down-regulated by the TNP-ATP treatment. This suggests that a lower level of PSD-95 results in loss of stability of NR1 and NR2B subunits in the synapse, which reduces the communication/coupling of NMDA receptors with intracellular signaling cascades. The underlying mechanisms between P2X receptor and PSD-95 interaction need further investigation.

P2X receptors play a crucial role in facilitating pain transmission at peripheral and spinal sites, as both peripheral sensory neurons and spinal cord dorsal horn neurons can be depolarized by ATP.<sup>48,49</sup> Studies have indicated that P2X and  $\mu$ -opioid receptors are functionally coupled in sensory neuron.<sup>50</sup> Extracellular ATP-evoked P2X receptor inward current inhibited opioid sensitivity in neurons cocultured with fibrosarcoma cells.<sup>51</sup> Translocation and activation of protein kinase C enhance postsynaptic neuron excitability in morphine-tolerant rats.<sup>10,52,53</sup> Moreover, activation of protein kinase C showed significant potentiation of  $Ca^{2+}$  signal and inward cation current (predominantly  $Na^+$ ), as well through P2X<sub>3</sub> receptor in DT-40 3KO and human embryonic kidney 293 cells.<sup>54</sup> Up-regulation of P2X<sub>3</sub> receptor expression is seen after chronic constriction injury of the sciatic nerve and provokes ectopic sensitivity to ATP.<sup>55,56</sup> Recent reports using gene knockout, antisense oligonucleotides, or the selective P2X<sub>3</sub> antagonist A-317491 all point to a crucial role of P2X<sub>3</sub> receptors in chronic inflammatory and neuro-

pathic pain.<sup>20,57,58</sup> It is noteworthy that P2X receptor agonist-induced nociception can be inhibited by intrathecal administration of NMDA receptor antagonists.<sup>59</sup> A direct interaction between the purinergic and glutamatergic receptor systems in mediating nociceptive processing in the spinal cord is further supported by evidence that P2X receptor activation can stimulate glutamate release in spinal dorsal horn neurons.<sup>60</sup> In the present study, we found that treatment with the P2X receptor antagonist TNP-ATP preserves morphine's antinociceptive effect in morphine tolerant rats; the mechanisms might be involved in a significant reduction of synaptosomal NR1 and NR2B expression and morphine-evoked EAA release from presynaptic nerve terminals in morphine-tolerant rats. The above results provide direct evidence for an interaction between the purinergic and NMDA receptor systems.

TNP-ATP is one of the potent P2X receptor antagonists and is selective for P2X<sub>1</sub>, P2X<sub>3</sub>, and P2X<sub>2/3</sub> receptors.<sup>61</sup> Intrathecal administration of TNP-ATP attenuates  $\alpha$ , $\beta$ -meATP-induced hyperalgesia in mice and the pronociceptive effect of formalin and capsaicin.<sup>59,62</sup> In our present study, intrathecal treatment with TNP-ATP (63 nM) alone produced no antinociceptive effect. Although previous studies indicated that intrathecal administration of low doses of TNP-ATP (1–10 nM) produces a partial, but significant, antinociceptive effect in mice,<sup>62</sup> and intradermal administration of larger doses (100–300 nM) produces significant attenuation (approximately 50%) of short-term formalin-induced paw flinching.<sup>63</sup> Intraperitoneal administration of sufficient doses of TNP-ATP (100  $\mu$ M/kg) can completely block visceral nociception in the abdominal constriction assay.<sup>64</sup> These diverse results might be due to differences in the doses of TNP-ATP, animal models, and relevant site of action. The differences need further investigation.

In conclusion, our present study demonstrates that TNP-ATP treatment restores the antinociceptive effect of morphine in morphine-tolerant rats possibly by inducing internalization of NR1 and NR2B from the synaptosomal membrane into the neuron cytosol, thus reducing NMDA receptor-mediated intracellular signaling and EAA release in the CSF after morphine challenge. The synaptic trafficking of glutamate receptor subunit NR1 and NR2B may be modulated by the synaptic scaffolding proteins PSD-95.

## References

- Benyamin R, Trescot AM, Datta S, Buenaventura R, Adlaka R, Sehgal N, Glaser SE, Vallejo R: Opioid complications and side effects. *Pain Physician* 2008; 11:S105–20
- Gintzler AR, Chakrabarti S: Opioid tolerance and the emergence of new opioid receptor-coupled signaling. *Mol Neurobiol* 2000; 21:21–33
- Martini L, Whistler JL: The role of mu opioid receptor desensitization and endocytosis in morphine tolerance and dependence. *Curr Opin Neurobiol* 2007; 17:556–64
- Hsu MM, Wong CS: The roles of pain facilitatory systems in opioid tolerance. *Acta Anaesthesiol Sin* 2000; 38:155–66
- Raghavendra V, Rutkowski MD, DeLeo JA: The role of spinal neuroimmune activation in morphine tolerance/hyperalgesia in neuropathic and sham-operated rats. *J Neurosci* 2002; 22:9980–9
- Tai YH, Wang YH, Tsai RY, Wang JJ, Tao PL, Liu TM, Wang YC, Wong CS: Amitriptyline preserves morphine's antinociceptive effect by regulating the glutamate transporter GLAST and GLT-1 trafficking and excitatory amino acids concentration in morphine-tolerant rats. *Pain* 2007; 129:343–54
- Tai YH, Wang YH, Wang JJ, Tao PL, Tung CS, Wong CS: Amitriptyline suppresses neuroinflammation and up-regulates glutamate transporters in morphine-tolerant rats. *Pain* 2006; 124:77–86
- Fundytus ME: Glutamate receptors and nociception: Implications for the drug treatment of pain. *CNS Drugs* 2001; 15:29–58
- Bleakman D, Alt A, Nisenbaum ES: Glutamate receptors and pain. *Semin Cell Dev Biol* 2006; 17:592–604
- Mao J, Mayer DJ: Spinal cord neuroplasticity following repeated opioid exposure and its relation to pathological pain. *Ann NY Acad Sci* 2001; 933:175–84
- Koyuncuoglu H, Nurten A, Yamantürk P, Nurten R: The importance of the number of NMDA receptors in the development of supersensitivity or tolerance to and dependence on morphine. *Pharmacol Res* 1999; 39:311–9
- Shimoyama N, Shimoyama M, Davis AM, Monaghan DT, Inturrisi CE: An antisense oligonucleotide to the N-methyl-D-aspartate (NMDA) subunit NMDAR1 attenuates NMDA-induced nociception, hyperalgesia, and morphine tolerance. *J Pharmacol Exp Ther* 2005; 312:834–40
- Burnstock G: Purinergic signalling and disorders of the central nervous system. *Nat Rev Drug Discov* 2008; 7:575–90
- Dorn G, Patel S, Wotherspoon G, Hemmings-Mieszcak M, Barclay J, Natt FJ, Martin P, Bevan S, Fox A, Ganju P, Wishart W, Hall J: siRNA relieves chronic neuropathic pain. *Nucleic Acids Res* 2004; 32:e49
- Honore P, Kage K, Mikusa J, Watt AT, Johnston JF, Wyatt JR, Faltynek CR, Jarvis MF, Lynch K: Analgesic profile of intrathecal P2X<sub>3</sub> antisense oligonucleotide treatment in chronic inflammatory and neuropathic pain states in rats. *Pain* 2002; 99:11–9
- Jarvis MF, Kowaluk EA: Pharmacological characterization of P2X<sub>3</sub> homomeric and heteromeric channels in nociceptive signaling and behavior. *Drug Dev Res* 2001; 52:220–31
- Nakagawa T, Wakamatsu K, Zhang N, Maeda S, Minami M, Satoh M, Kaneko S: Intrathecal administration of ATP produces long-lasting allodynia in rats: Differential mechanisms in the phase of the induction and maintenance. *Neuroscience* 2007; 147:445–55
- Cockayne DA, Dunn PM, Zhong Y, Rong W, Hamilton SG, Knight GE, Ruan HZ, Ma B, Yip P, Nunn P, McMahon SB, Burnstock G, Ford AP: P2X<sub>2</sub> knockout mice and P2X<sub>2</sub>/P2X<sub>3</sub> double knockout mice reveal a role for the P2X<sub>2</sub> receptor subunit in mediating multiple sensory effects of ATP. *J Physiol* 2005; 567:621–39
- Oliveira MC, Pelegrini-da-Silva A, Tambeli CH, Parada CA: Peripheral mechanisms underlying the essential role of P2X<sub>3/2/3</sub> receptors in the development of inflammatory hyperalgesia. *Pain* 2009; 141:127–34
- Jarvis MF, Burgard EC, McGaraughty S, Honore P, Lynch K, Brennan TJ, Subieta A, Van Biesen T, Cartmell J, Bianchi B, Niforatos W, Kage K, Yu H, Mikusa J, Wismer CT, Zhu CZ, Chu K, Lee CH, Stewart AO, Polakowski J, Cox BF, Kowaluk E, Williams M, Sullivan J, Faltynek C: A-317491, a novel potent and selective non-nucleotide antagonist of P2X<sub>3</sub> and P2X<sub>2/3</sub> receptors, reduces chronic inflammatory and neuropathic pain in the rat. *Proc Natl Acad Sci U S A* 2002; 99:17179–84
- McGaraughty S, Honore P, Wismer CT, Mikusa J, Zhu CZ, McDonald HA, Bianchi B, Faltynek CR, Jarvis MF: Endoge-



- nous opioid mechanisms partially mediate P2X<sub>3</sub>/P2X<sub>2</sub>/3-related antinociception in rat models of inflammatory and chemogenic pain but not neuropathic pain. *Br J Pharmacol* 2005; 146:180–8
22. Mao J, Price DD, Mayer DJ: Mechanisms of hyperalgesia and morphine tolerance: A current view of their possible interactions. *Pain* 1995; 62:259–74
  23. Grossman ML, Basbaum AI, Fields HL: Afferent and efferent connections of the rat tail flick reflex (a model used to analyze pain control mechanisms). *J Comp Neurol* 1982; 206:9–16
  24. Marsala M, Malmberg AB, Yaksh TL: The spinal loop dialysis catheter: Characterization of use in the unanesthetized rat. *J Neurosci Methods* 1995; 62:43–53
  25. Tsai RY, Jang FL, Tai YH, Lin SL, Shen CH, Wong CS: Ultra-low-dose naloxone restores the antinociceptive effect of morphine and suppresses spinal neuroinflammation in PTX-treated rats. *Neuropsychopharmacology* 2008; 33:2772–82
  26. Aanonsen LM, Lei S, Wilcox GL: Excitatory amino acid receptors and nociceptive neurotransmission in rat spinal cord. *Pain* 1990; 41:309–21
  27. Jhamandas KH, Marsala M, Ibuki T, Yaksh TL: Spinal amino acid release and precipitated withdrawal in rats chronically infused with spinal morphine. *J Neurosci* 1996; 16:2758–66
  28. Wen ZH, Chang YC, Chong CH, Wang JJ, Tao PL, Wong CS: Increasing of intrathecal CSF excitatory amino acids concentration following morphine challenge in morphine-tolerant rats. *Brain Res* 2004; 995:253–9
  29. Chen L, Huang LY: Sustained potentiation of NMDA receptor-mediated glutamate responses through activation of protein kinase C by a mu opioid. *Neuron* 1991; 7:319–26
  30. Crain SM, Shen KF: Modulation of opioid analgesia, tolerance and dependence by Gs-coupled, GM1 ganglioside-regulated opioid receptor functions. *Trends Pharmacol Sci* 1998; 19:358–65
  31. Crain SM, Shen KF: Antagonists of excitatory opioid receptor functions enhance morphine's analgesic potency and attenuate opioid tolerance/dependence liability. *Pain* 2000; 84:121–31
  32. Lin JA, Lee MS, Wu CT, Yeh CC, Lin SL, Wen ZH, Wong CS: Attenuation of morphine tolerance by intrathecal gabapentin is associated with suppression of morphine-evoked excitatory amino acid release in the rat spinal cord. *Brain Res* 2005; 1054:167–73
  33. Lutfy K, Doan P, Weber E: ACEA-1328, a NMDA receptor/glycine site antagonist, acutely potentiates antinociception and chronically attenuates tolerance induced by morphine. *Pharmacol Res* 1999; 40:435–42
  34. Marek P, Ben-Eliyahu S, Gold M, Liebeskind JC: Excitatory amino acid antagonists (kynurenic acid and MK-801) attenuate the development of morphine tolerance in the rat. *Brain Res* 1991; 547:77–81
  35. Mao J, Price DD, Lu J, Mayer DJ: Antinociceptive tolerance to the mu-opioid agonist DAMGO is dose-dependently reduced by MK-801 in rats. *Neurosci Lett* 1998; 250:193–6
  36. Miyamoto Y, Yamada K, Nagai T, Mori H, Mishina M, Furukawa H, Noda Y, Nabeshima T: Behavioural adaptations to addictive drugs in mice lacking the NMDA receptor epsilon1 subunit. *Eur J Neurosci* 2004; 19:151–8
  37. Yang X, Yang HB, Xie QJ, Liu XH, Hu XD: Peripheral inflammation increased the synaptic expression of NMDA receptors in spinal dorsal horn. *Pain* 2009; 144:162–9
  38. Lim G, Wang S, Zeng Q, Sung B, Yang L, Mao J: Expression of spinal NMDA receptor and PKCgamma after chronic morphine is regulated by spinal glucocorticoid receptor. *J Neurosci* 2005; 25:11145–54
  39. South SM, Kohno T, Kaspar BK, Hegarty D, Vissel B, Drake CT, Ohata M, Jenab S, Sailer AW, Malkmus S, Masuyama T, Horner P, Bogulavsky J, Gage FH, Yaksh TL, Woolf CJ, Heinemann SF, Inturrisi CE: A conditional deletion of the NR1 subunit of the NMDA receptor in adult spinal cord dorsal horn reduces NMDA currents and injury-induced pain. *J Neurosci* 2003; 23:5031–40
  40. Christopherson KS, Hillier BJ, Lim WA, Bredt DS: PSD-95 assembles a ternary complex with the N-methyl-D-aspartic acid receptor and a bivalent neuronal NO synthase PDZ domain. *J Biol Chem* 1999; 274:27467–73
  41. Kornau HC, Schenker LT, Kennedy MB, Seeburg PH: Domain interaction between NMDA receptor subunits and the postsynaptic density protein PSD-95. *Science* 1995; 269:1737–40
  42. Prybylowski K, Chang K, Sans N, Kan L, Vicini S, Wenthold RJ: The synaptic localization of NR2B-containing NMDA receptors is controlled by interactions with PDZ proteins and AP-2. *Neuron* 2005; 47:845–57
  43. Roche KW, Standley S, McCallum J, Dune Ly C, Ehlers MD, Wenthold RJ: Molecular determinants of NMDA receptor internalization. *Nat Neurosci* 2001; 4:794–802
  44. Sattler R, Xiong Z, Lu WY, Hafner M, MacDonald JF, Tymianski M: Specific coupling of NMDA receptor activation to nitric oxide neurotoxicity by PSD-95 protein. *Science* 1999; 284:1845–8
  45. Lin Y, Skeberdis VA, Francesconi A, Bennett MV, Zukin RS: Postsynaptic density protein-95 regulates NMDA channel gating and surface expression. *J Neurosci* 2004; 24:10138–48
  46. Rutter AR, Freeman FM, Stephenson FA: Further characterization of the molecular interaction between PSD-95 and NMDA receptors: The effect of the NR1 splice variant and evidence for modulation of channel gating. *J Neurochem* 2002; 81:1298–307
  47. Rutter AR, Stephenson FA: Coexpression of postsynaptic density-95 protein with NMDA receptors results in enhanced receptor expression together with a decreased sensitivity to L-glutamate. *J Neurochem* 2000; 75:2501–10
  48. Burnstock G: Purinergic P2 receptors as targets for novel analgesics. *Pharmacol Ther* 2006; 110:433–54
  49. Chizh BA, Illes P: P2X receptors and nociception. *Pharmacol Rev* 2001; 53:553–68
  50. Chizhnikov I, Yudin Y, Mamenko N, Prudnikov I, Tamarova Z, Krishtal O: Opioids inhibit purinergic nociceptors in the sensory neurons and fibres of rat *via* a G protein-dependent mechanism. *Neuropharmacology* 2005; 48:639–47
  51. Chizhnikov I, Mamenko N, Volkova T, Khasabova I, Simone DA, Krishtal O: P2X receptors in sensory neurons co-cultured with cancer cells exhibit a decrease in opioid sensitivity. *Eur J Neurosci* 2009; 29:76–86
  52. Mayer DJ, Mao J, Price DD: The development of morphine tolerance and dependence is associated with translocation of protein kinase C. *Pain* 1995; 61:365–74
  53. Narita M, Makimura M, Feng Y, Hoskins B, Ho IK: Influence of chronic morphine treatment on protein kinase C activity: Comparison with butorphanol and implication for opioid tolerance. *Brain Res* 1994; 650:175–9
  54. Brown DA, Yule DI: Protein kinase C regulation of P2X<sub>3</sub> receptors is unlikely to involve direct receptor phosphorylation. *Biochim Biophys Acta* 2007; 1773:166–75
  55. Chen Y, Shu Y, Zhao Z: Ectopic purinergic sensitivity develops at sites of chronic nerve constriction injury in rat. *Neuroreport* 1999; 10:2779–82
  56. Novakovic SD, Kassotakis LC, Oglesby IB, Smith JA, Eglen RM, Ford AP, Hunter JC: Immunocytochemical localization of P2X<sub>3</sub> purinoceptors in sensory neurons in naive rats and following neuropathic injury. *Pain* 1999; 80:273–82
  57. Barclay J, Patel S, Dorn G, Wotherspoon G, Moffatt S, Eunson L, Abdel'al S, Natt F, Hall J, Winter J, Bevan S, Wishart W, Fox A, Ganju P: Functional downregulation of P2X<sub>3</sub> receptor subunit in rat sensory neurons reveals a

- significant role in chronic neuropathic and inflammatory pain. *J Neurosci* 2002; 22:8139–47
58. Cockayne DA, Hamilton SG, Zhu QM, Dunn PM, Zhong Y, Novakovic S, Malmberg AB, Cain G, Berson A, Kassotakis L, Hedley L, Lachnit WG, Burnstock G, McMahon SB, Ford AP: Urinary bladder hyporeflexia and reduced pain-related behaviour in P2X3-deficient mice. *Nature* 2000; 407:1011–5
  59. Tsuda M, Ueno S, Inoue K: *In vivo* pathway of thermal hyperalgesia by intrathecal administration of alpha,beta-methylene ATP in mouse spinal cord: Involvement of the glutamate-NMDA receptor system. *Br J Pharmacol* 1999; 127:449–56
  60. Gu JG, MacDermott AB: Activation of ATP P2X receptors elicits glutamate release from sensory neuron synapses. *Nature* 1997; 389:749–53
  61. Lewis CJ, Surprenant A, Evans RJ: 2',3'-O-(2,4,6- trinitrophenyl) adenosine 5'-triphosphate (TNP-ATP)—a nanomolar affinity antagonist at rat mesenteric artery P2X receptor ion channels. *Br J Pharmacol* 1998; 124:1463–6
  62. Tsuda M, Ueno S, Inoue K: Evidence for the involvement of spinal endogenous ATP and P2X receptors in nociceptive responses caused by formalin and capsaicin in mice. *Br J Pharmacol* 1999; 128:1497–504
  63. Jarvis MF, Wismer CT, Schweitzer E, Yu H, van Biesen T, Lynch KJ, Burgard EC, Kowaluk EA: Modulation of BzATP and formalin induced nociception: Attenuation by the P2X receptor antagonist, TNP-ATP and enhancement by the P2X(3) allosteric modulator, cibacron blue. *Br J Pharmacol* 2001; 132:259–69
  64. Honore P, Mikusa J, Bianchi B, McDonald H, Cartmell J, Faltynek C, Jarvis MF: TNP-ATP, a potent P2X3 receptor antagonist, blocks acetic acid-induced abdominal constriction in mice: Comparison with reference analgesics. *Pain* 2002; 96:99–105
